# Supplementary material for: A novel human aquaporin-4 splice variant exhibits a dominant-negative activity: a new mechanism to regulate water permeability
Source: PubMed Central journal article supplement — Mol Biol Cell. 2014 Feb 15;25(4):470–80. doi: 10.1091/mbc.E13-06-0331 (PMC3923639; doi:10.1091/mbc.e13-06-0331), 2014-02-15
Supplement: supp_E13-06-0331v1_CombinedSupMats.pdf [file supp_E13-06-0331v1_CombinedSupMats.pdf]

# Supplemental Materials

*Molecular Biology of the Cell*

De Bellis et al.

**Supplementary Figure 1: Localization of the C-terminal motif of AQP4-Δ4**

(A) Immunofluorescence experiment performed on HeLa cells transiently transfected with AQP4-Δ4 (Δ4), and permeabilized or not with Triton-X100 0.3 % for 10 min. AQP4-Δ4 was detected with a commercial antibody that recognized the C-terminal sequence of AQP4. (B) Model of transmembrane topology of AQP4- Δ4 showing relative orientation of N- and C-terminus, transmembrane segments (indicated with numbers) and loops (indicated with capital letters)

**Supplementary Figure 2 movie: Confocal microscopy analysis of AQP4-Δ4.**

Movie showing all the different confocal planes and co-localization degree of AQP4- Δ4 (green ) with ER marker (red) in transfected HeLa cells.

**Supplementary Figure 3: AQP4-Δ4 protein cellular localization**

Two different confocal planes, ER plane (top panel) and plasma membrane plane (bottom panel), of a single z-stack showing localization of AQP4-Δ4 (Δ4, green) in transfected HeLa cells using the ER subcellular markers (red). Note that a weak AQP4-Δ4 signal is observed at the periphery of the cells, likely at the plasma membrane. Scale bar 15 μm.

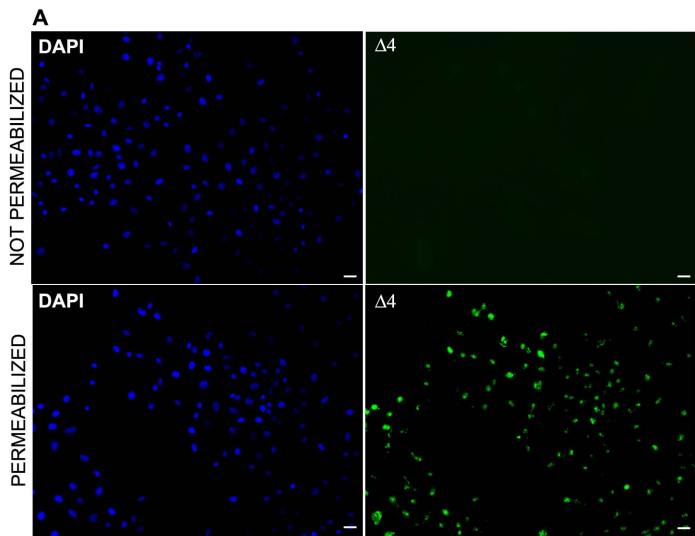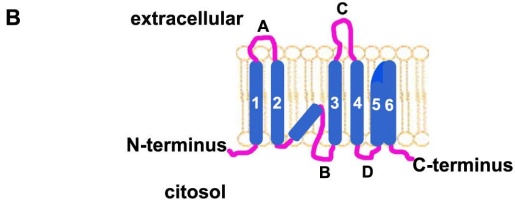

Supplementary figure 1

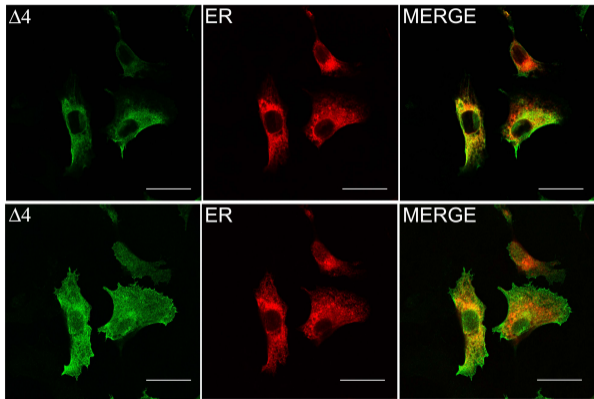

Supplementary Figure 3
